# Supplementary material for: Mckelveyite group minerals – Part 3: Bainbridgeite-(YCe), Na2Ba2YCe(CO3)6 ⋅ 3H2O, a new species from Mont Saint-Hilaire, Canada
Source: Copernicus journal article supplement (doi:10.5194/ejm-36-183-2024), 2024-02-09
Supplement: Supplementary file 1 [file ejm-36-183-2024-supplement.zip]

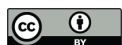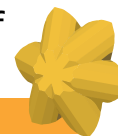

*Supplement of*

**Mckelveyite group minerals – Part 3:  
Bainbridgeite-(YCe),  $\text{Na}_2\text{Ba}_2\text{YCe}(\text{CO}_3)_6 \cdot 3\text{H}_2\text{O}$ ,  
a new species from Mont Saint-Hilaire, Canada**

**Inna Lykova et al.**

*Correspondence to:* Inna Lykova (ilykova@nature.ca)

- [ejm-36-183-2024-supplement-title-page.pdf](#)
- Supplement
  - [bainbridgeite-\(YCe\).cif](#)
  - [bainbridgeite-\(YCe\).xy](#)

The copyright of individual parts of the supplement might differ from the article licence.
